# Supplementary material for: TP53 in Biology and Treatment of Osteosarcoma
Source: MDPI journal article supplement (doi:10.3390/cancers13174284), 2021-08-25
Supplement: s1 [file s1]

## Supplementary Materials: TP53 in Biology and Treatment of Osteosarcoma

Kamil Jozef Synoradzki, Ewa Bartnik, Anna M. Czarnecka, Michał Fiedorowicz, Wiktoria Firlej, Anna Brodziak, Agnieszka Stasinska, Piotr Rutkowski and Paweł Grieb

**Table S1.** List of missense mutations in the *TP53* gene founded in osteosarcoma derived patients samples. Description possess number of exon in which mutation is localize, codon number and literature reference. Abbreviation used are: Ref. for aminoacid which was changed and Alt. for altered aminoacid.

| EXON | REF. | CODON | ALT.          | LITERATURE    |
|------|------|-------|---------------|---------------|
| 2    | D    | 7     | N             | [79]          |
| 3    | R    | 26    | W             | [79]          |
| 4    | P    | 47    | L / S         | [80], [81]    |
| 4    | P    | 72    | R             | [81]          |
| 4    | Y    | 107   | H             | [81]          |
| 4    | G    | 108   | S             | [81]          |
| 5    | S    | 127   | P             | [82]          |
| 5    | C    | 135   | Y / F / R / W | [79], [83]    |
| 5    | V    | 147   | D             | [79]          |
| 5    | P    | 151   | A             | [81]          |
| 5    | V    | 157   | F             | [83]          |
| 5    | A    | 159   | N             | [84]          |
| 5    | Y    | 163   | C             | [79]          |
| 5    | V    | 172   | N             | [80]          |
| 5    | V    | 173   | M / G / L     | [82,85], [79] |
| 5    | R    | 175   | H             | [79-81,85-87] |
| 5    | H    | 179   | Q / Y         | [88], [89]    |
| 5    | R    | 181   | P             | [80]          |
| 5    | S    | 185   | N             | [81]          |
| 6    | H    | 193   | Q / Y         | [86,90], [83] |
| 6    | V    | 197   | G             | [80]          |
| 6    | Y    | 205   | C             | [80,88,91]    |
| 6    | S    | 215   | I             | [79]          |

|   |   |     |               |                                                            |
|---|---|-----|---------------|------------------------------------------------------------|
| 6 | Y | 220 | C             | [80,83,85]                                                 |
| 6 | E | 224 | D             | [85,89]                                                    |
| 7 | N | 235 | S             | [81]                                                       |
| 7 | Y | 236 | C             | [83]                                                       |
| 7 | M | 237 | I             | [79,80,91]                                                 |
| 7 | C | 238 | F / G / Y     | [79,92], [80]                                              |
| 7 | S | 241 | Y             | [86]                                                       |
| 7 | C | 242 | Y / R         | [80-82], [81]                                              |
| 7 | G | 244 | V             | [86]                                                       |
| 7 | G | 245 | S / D         | [80], [89]                                                 |
| 7 | M | 246 | T             | [81]                                                       |
| 7 | R | 248 | Q / W / G     | [80-83,88,89,91],<br>[79,80,89], [83]                      |
| 7 | R | 249 | T             | [82]                                                       |
| 7 | P | 250 | I / L / F     | [80], [86,90], [87]                                        |
| 7 | I | 255 | T / F         | [92], [79]                                                 |
| 7 | T | 256 | S / P         | [80,91], [82,83]                                           |
| 7 | L | 257 | R             | [83]                                                       |
| 7 | D | 259 | V             | [86]                                                       |
| 8 | R | 267 | W             | [82]                                                       |
| 8 | N | 268 | S             | [87]                                                       |
| 8 | V | 272 | M             | [85]                                                       |
| 8 | R | 273 | H / L / C     | [80-82,85-90],<br>[79,92], [85]                            |
| 8 | C | 275 | Y             | [79,82,92]                                                 |
| 8 | A | 276 | P / G         | [89], [79]                                                 |
| 8 | C | 277 | F             | [82]                                                       |
| 8 | P | 278 | A             | [81]                                                       |
| 8 | R | 280 | H             | [80]                                                       |
| 8 | D | 281 | E / N / H / V | [79,83,90,92],<br>[80,86,90],<br>[80,85,86,90],<br>[82,83] |

|    |   |     |           |                              |
|----|---|-----|-----------|------------------------------|
| 8  | R | 282 | Q / W     | [89], [81,83]                |
| 8  | E | 285 | K         | [80,88]                      |
| 8  | E | 286 | K         | [81]                         |
| 8  | R | 290 | C         | [82]                         |
| 8  | E | 298 | K         | [81]                         |
| 10 | R | 337 | H / C / L | [82,88], [79,80,83],<br>[82] |

**Table S2.** Overview of clinical trials retrieved from ClinicalTrials.gov and EU Clinical Trials Register. The search was performed with keywords: p53, gene therapy. Trials with status “withdrawn” were excluded. Databases accessed on 10/22/2020.

| Trial No.   | Condition/group of patients                                                 | Administered agent                                                                  | Phase | Start (year) | Status  | Enrollment | Locations                                                                                                     |
|-------------|-----------------------------------------------------------------------------|-------------------------------------------------------------------------------------|-------|--------------|---------|------------|---------------------------------------------------------------------------------------------------------------|
| NCT02561546 | Diabetes concurrent with Hepatocellular carcinoma (HCC).                    | p53 gene therapy, Trans-catheter embolization (TAE)                                 | 2     | 2015         | Unknown | 40         | China, Liaoning<br>first affiliated hospital in Dalian University<br>Dalian, Liaoning, China                  |
| NCT02509169 | Advanced Hepatocellular Carcinoma (HCC)                                     | TAE plus P53 gene therapy                                                           | 2     | 2014         | Unknown | 60         | China, Liaoning<br>first affiliated hospital in Dalian University<br>Dalian, Liaoning, China                  |
| NCT01574729 | Non-small Cell Lung Cancer                                                  | Surgery combined with rAd-p53 gene therapy                                          | 2     | 2012         | Unknown | 120        | Institute of Surgery Research, Daping Hospital, Third Military Medical University Chongqing, Chongqing, China |
| NCT02435186 | Ovarian Epithelial Cancer, Fallopian Tube Cancer, Primary Peritoneal Cancer | p53 gene, Cisplatin, Paclitaxel                                                     | 2     | 2015         | Unknown | 100        | Xijing Hospital in China Medical University Shenyang Liaoning, China,                                         |
| NCT00902083 | Advanced Oral and Maxillofacial Malignant Tumors                            | -p53 gene with surgery<br>-p53 gene with standard chemotherapy<br>-p53 gene therapy | 4     | 2009         | Unknown | 600        | West China Hospital, Sichuan University<br>Chengdu, Sichuan, China                                            |
| NCT02429037 | Advanced Head and Neck Cancer                                               | - radiation and Cisplatin<br>-rAd-p53 and radiation and Cisplatin                   | 2     | 2015         | Unknown | 60         | Jiangsu cancer hospital<br>Nanjing, Jiangsu, China                                                            |

|             |                                                                                                                                                |                                                                        |   |      |           |     |                                                                                                    |
|-------------|------------------------------------------------------------------------------------------------------------------------------------------------|------------------------------------------------------------------------|---|------|-----------|-----|----------------------------------------------------------------------------------------------------|
| NCT00902122 | Advanced Malignant Thyroid Tumors                                                                                                              | -rAd-p53<br>- rAd-p53 with surgery<br>-rAd-p53 with radioactive iodine | 4 | 2009 | Unknown   | 600 | West China Hospital, Sichuan University Chengdu, Sichuan, China                                    |
| NCT02429726 | Malignant Pleural Effusion                                                                                                                     | -rAdp53<br>-Cisplating<br>- rAdp53 plus cisplatin                      | 2 | 2015 | Unknown   | 90  | The First Affiliated Hospital of Xi'an Jiao Tong University<br>Xian, Shanxi, China                 |
| NCT00064103 | -Lip and Oral Cavity Cancer<br>-Oropharyngeal Cancer Stage 0<br>-Lip and Oral Cavity Cancer Stage 0<br>-Oropharyngeal Cancer<br>-Tongue Cancer | Ad5CMV-p53 gene                                                        | 2 | 2003 | Completed | 51  | M D Anderson Cancer Center Houston, Texas, United States                                           |
| NCT02418988 | Advanced Adult Hepatocellular Carcinoma                                                                                                        | -TACE plus rAd-p53 artery injection<br>- TACE                          | 2 | 2014 | Unknown   | 120 | China, Shanxi<br>Xijing Hospital of the Fourth Military Medical University<br>Xi An, Shanxi, China |

---

|             |                  |                                                                                                                                                                                                             |   |      |            |    |                                                                                                                |
|-------------|------------------|-------------------------------------------------------------------------------------------------------------------------------------------------------------------------------------------------------------|---|------|------------|----|----------------------------------------------------------------------------------------------------------------|
| NCT00001827 | Ovarian Neoplasm | -Aldesleukin<br>-incomplete Freund's adjuvant<br>-p53 peptide vaccine<br>-Sargramostim<br>-therapeutic autologous dendritic cells<br>Procedure: in vitro-treated peripheral blood stem cell transplantation | 2 | 1999 | Terminated | 21 | United States, Maryland<br>National Institutes of Health Clinical Center,<br>Bethesda, Maryland, United States |
|-------------|------------------|-------------------------------------------------------------------------------------------------------------------------------------------------------------------------------------------------------------|---|------|------------|----|----------------------------------------------------------------------------------------------------------------|

---

|             |                                            |                                                       |   |      |           |       |                                                                  |
|-------------|--------------------------------------------|-------------------------------------------------------|---|------|-----------|-------|------------------------------------------------------------------|
| NCT01191684 | Recurrent Colon Cancer                     | modified vaccinia virus ankara vaccine expressing p53 | 1 | 2011 | Completed | 12    | City of Hope Medical Center<br>Duarte, California, United States |
|             | Recurrent Gastric Cancer                   |                                                       |   |      |           |       |                                                                  |
|             | Recurrent Pancreatic Cancer                |                                                       |   |      |           |       |                                                                  |
|             | Recurrent Rectal Cancer                    |                                                       |   |      |           |       |                                                                  |
|             | Stage III Colon Cancer                     |                                                       |   |      |           |       |                                                                  |
|             | Stage III Gastric Cancer                   |                                                       |   |      |           |       |                                                                  |
|             | Stage III Pancreatic Cancer                |                                                       |   |      |           |       |                                                                  |
|             | Stage III Rectal Cancer                    |                                                       |   |      |           |       |                                                                  |
|             | Stage IV Colon Cancer                      |                                                       |   |      |           |       |                                                                  |
|             | Stage IV Gastric Cancer                    |                                                       |   |      |           |       |                                                                  |
|             | Stage IV Pancreatic Cancer                 |                                                       |   |      |           |       |                                                                  |
|             | Stage IV Rectal Cancer                     |                                                       |   |      |           |       |                                                                  |
|             |                                            |                                                       |   |      |           |       |                                                                  |
|             |                                            |                                                       |   |      |           |       |                                                                  |
| NCT00003450 | Ovarian Cancer<br>Peritoneal Cavity Cancer | Ad5CMV-p53 gene                                       | 1 | 1998 | Completed | 15-20 | Simmons Cancer Center - Dallas<br>Dallas, Texas, United States   |

|             |                                                  |                                                                                                                                                                                          |   |      |            |      |                                                                                                              |
|-------------|--------------------------------------------------|------------------------------------------------------------------------------------------------------------------------------------------------------------------------------------------|---|------|------------|------|--------------------------------------------------------------------------------------------------------------|
| NCT00894153 | head and neck malignant tumors in advanced stage | -rAd-p53 intra-tumor injection<br>- rAd-p53 intra-tumor injection plus chemotherapy<br>- rAd-p53 intra-tumor injection plus radiotherapy<br>- rAd-p53 intra-tumor injection plus surgery | 4 | 2009 | Unknown    | 1200 | Department of oral and maxillofacial surgery, Huaxi university of medical science<br>Chendu, Shichuan, China |
| NCT00004041 | Brain and Central Nervous System Tumors          | intratumoral stereotactic injection of adenovirus p53 (Ad-p53)                                                                                                                           | 1 | 1999 | Completed  | 30   | UCSF Cancer Center and Cancer Research Institute<br>San Francisco, California, United States                 |
| NCT00004038 | Breast Cancer                                    | Ad5CMV-p53 gene plus chemotherapy                                                                                                                                                        | 1 | 1999 | Completed  | 20   | Fox Chase Cancer Center<br>Philadelphia, Pennsylvania, United States                                         |
| NCT00003147 | Liver Cancer                                     | Ad5CMV-p53 gene                                                                                                                                                                          | 1 | 1998 | Terminated | 30   | Albert Einstein Comprehensive Cancer Center<br>Bronx, New York, United States                                |
| NCT00410865 | Mouth Cancer                                     | INGN 201 (Ad-p53 gene)                                                                                                                                                                   | 1 | 2003 | Terminated | 4    | UT MD Anderson Cancer Center<br>Houston, Texas, United States                                                |



|             |                                                                                                                                 |                                           |   |      |            |    |                                                                                                                                                                                                             |
|-------------|---------------------------------------------------------------------------------------------------------------------------------|-------------------------------------------|---|------|------------|----|-------------------------------------------------------------------------------------------------------------------------------------------------------------------------------------------------------------|
| NCT00003167 | -Recurrent Bladder Cancer:<br>-Stage I<br>-Stage II<br>- Stage III<br>- Stage IV<br>-Transitional Cell Carcinoma of the Bladder | Ad5CMV-p53 gene                           | 1 | 1998 | Completed  | 24 | M D Anderson Cancer Center<br>Houston, Texas, United States                                                                                                                                                 |
| NCT00003649 | Lung Cancer                                                                                                                     | Ad5CMV-p53 gene                           | 1 | 1998 | Completed  | 15 | Veterans Affairs Medical Center - Tennessee Valley<br>Healthcare System - Nashville Campus<br>Nashville, Tennessee, United States<br>Vanderbilt-Ingram Cancer Center<br>Nashville, Tennessee, United States |
| NCT00003588 | Ovarian Cancer                                                                                                                  | Ad5CMV-p53 gene<br>(laparoscopic surgery) | 1 | 1998 | Completed  | 30 | University of Texas - MD Anderson Cancer Center<br>Houston, Texas, United States                                                                                                                            |
| NCT03544723 | Solid Tumor<br>Lymphoma                                                                                                         | Ad-p53                                    | 2 | 2018 | Recruiting | 40 | Robert H. Lurie Comprehensive Cancer Center  <br>Northwestern University<br>Chicago, Illinois, United States                                                                                                |

---

|             |                         |                 |   |      |         |    |                                                                                                               |
|-------------|-------------------------|-----------------|---|------|---------|----|---------------------------------------------------------------------------------------------------------------|
|             |                         |                 |   |      |         |    | Sidney Kimmel Cancer Center<br>San Diego, California, United States,                                          |
|             |                         |                 |   |      |         |    | University of Colorado Cancer Center<br>Denver, Colorado, United States                                       |
|             |                         |                 |   |      |         |    | University of Connecticut School of Medicine<br>Farmington, Connecticut, United States                        |
|             |                         |                 |   |      |         |    | Clinical Sciences Building<br>Chicago, Illinois, United States                                                |
|             |                         |                 |   |      |         |    | University of Iowa Hospitals and Clinics<br>Iowa City, Iowa, United States                                    |
| NCT00003257 | Head and Neck<br>Cancer | Ad5CMV-p53 gene | 2 | 1998 | Unknown | 39 | University of Kansas Medical Center<br>Kansas City, Kansas, United States                                     |
|             |                         |                 |   |      |         |    | Tulane University School of Medicine<br>New Orleans, Louisiana, United States                                 |
|             |                         |                 |   |      |         |    | Marlene & Stewart Greenebaum Cancer Center, Uni-<br>versity of Maryland<br>Baltimore, Maryland, United States |
|             |                         |                 |   |      |         |    | Albert Einstein Comprehensive Cancer Center<br>Bronx, New York, United States                                 |
|             |                         |                 |   |      |         |    | Simmons Cancer Center - Dallas<br>Dallas, Texas, United States                                                |

---

|             |                              |                                                                          |   |      |            |    |                                                                                                                           |
|-------------|------------------------------|--------------------------------------------------------------------------|---|------|------------|----|---------------------------------------------------------------------------------------------------------------------------|
| NCT00017173 | Head and Neck Cancer         | Ad5CMV-p53 gene, cisplatin, conventional surgery, radiation therapy      | 2 | 2003 | Terminated | 13 | Kansas Masonic Cancer Research Institute at the University of Kansas Medical Center<br>Kansas City, Kansas, United States |
|             |                              |                                                                          |   |      |            |    | Markey Cancer Center at University of Kentucky<br>Chandler Medical Center<br>Lexington, Kentucky, United States           |
|             |                              |                                                                          |   |      |            |    | Barbara Ann Karmanos Cancer Institute<br>Detroit, Michigan, United States                                                 |
| NCT02340156 | Recurrent Glioblastoma       | SGT53, Temozolomide                                                      | 2 | 2014 | Terminated | 1  | MD Anderson Cancer Center<br>Houston, Texas, United States                                                                |
|             |                              |                                                                          |   |      |            |    | China Medical University Hospital<br>Taichung, Taiwan                                                                     |
| NCT02340117 | Metastatic Pancreatic Cancer | SGT-53,nab-paclitaxel, Gemcitabine                                       | 2 | 2015 | Recruiting | 28 | Mary Crowley Cancer Research Center<br>Dallas, Texas, United States                                                       |
| NCT00049218 | Lung Cancer                  | Autologous dendritic cell-adenovirus p53 vaccine, Carboplatin, Etoposide | 2 | 2003 | Completed  | 56 | H. Lee Moffitt Cancer Center and Research Institute<br>Tampa, Florida, United States                                      |
| NCT00617409 | Small Cell Lung Cancer       | Paclitaxel, Ad.p53-DC vaccines, All-trans Retinoic Acid (ATRA)           | 2 | 2007 | Completed  | 69 | H. Lee Moffitt Cancer Center & Research Institute<br>Tampa, Florida, United States                                        |

|             |                                                                                                                                                                |                                                                                                                                                                                  |   |      |           |       |                                                                                                     |
|-------------|----------------------------------------------------------------------------------------------------------------------------------------------------------------|----------------------------------------------------------------------------------------------------------------------------------------------------------------------------------|---|------|-----------|-------|-----------------------------------------------------------------------------------------------------|
| NCT00004225 | Lung Cancer                                                                                                                                                    | Ad5CMV-p53 gene plus radiation therapy                                                                                                                                           | 1 | 2000 | Completed | 10    | Vanderbilt-Ingram Cancer Center at Vanderbilt Medical Center<br>Nashville, Tennessee, United States |
| NCT00044993 | Breast Cancer                                                                                                                                                  | -Ad5CMV-p53 gene plus docetaxel plus doxorubicin hydrochloride<br>-conventional surgery (neoadjuvant therapy)                                                                    | 2 | 2002 | Completed | 60    | University of Texas - MD Anderson Cancer Center<br>Houston, Texas, United States                    |
| NCT00393029 | Metastatic Cancer That Overexpresses p53 Using Lymphodepleting Conditioning Followed by Infusion of Anti-p53 T Cell Receptor (TCR)-Gene Engineered Lymphocytes | -Anti-protein 53 or tumor protein 53 (p53) T-cell receptor transduced peripheral blood lymphocytes<br>-Aldesleukin<br>-Filgrastim<br>-Cyclophosphamide<br>-fludarabine phosphate | 2 | 2006 | Completed | 12    | National Institutes of Health<br>Bethesda, Maryland, United States                                  |
| NCT00004080 | Brain and Central Nervous System Tumors (recurrent and progressive)                                                                                            | -recombinant adenovirus-p53 SCH-58500<br>conventional surgery                                                                                                                    | 1 | 1999 | Completed | 21-42 | Emory University, Atlanta, United States                                                            |

|             |                                                                                                                     |                                                                                                        |   |      |            |    |                                                                           |
|-------------|---------------------------------------------------------------------------------------------------------------------|--------------------------------------------------------------------------------------------------------|---|------|------------|----|---------------------------------------------------------------------------|
| NCT00002960 | Fallopian Tube Cancer<br>Metastatic Cancer<br>Ovarian Cancer<br>Primary Peritoneal Cavity Cancer                    | recombinant adenovirus-p53 SCH-58500                                                                   | 1 | 1999 | Completed  | 59 | Merck Sharp & Dohme Corp., United States, Germany                         |
| NCT00041613 | Carcinoma, Squamous Cell                                                                                            | INGN 201                                                                                               | 3 |      | Unknown    |    | University of Colorado Cancer Center<br>Aurora, Colorado, United States   |
| NCT00041626 | Carcinoma, Squamous Cell                                                                                            | INGN 201                                                                                               | 3 |      | Unknown    |    | University of Arkansas, Little Rock, Arkansas, United States              |
| NCT00776295 | Small Cell Lung Cancer                                                                                              | Combined adenovirus vectored p53 transfected dendritic cell vaccine and ex vivo expanded T-lymphocytes | 2 | 2007 | Terminated | 2  | H. Lee Moffitt Cancer Center & Research Institute,<br>Tampa, Florida, USA |
| NCT02275039 | Recurrent Ovarian Epithelial Cancer<br>Recurrent Fallopian Tube Carcinoma<br>Recurrent Primary Peritoneal Carcinoma | -modified vaccinia virus ankara vaccine expressing p53-gemcitabine hydrochloride                       | 1 | 2015 | Completed  | 12 | City of Hope Medical Center<br>Duarte, California, United States          |
| NCT00844506 | Ovarian Cancer                                                                                                      | P53-SLP vaccine<br>Cyclophosphamide                                                                    | 2 | 2008 | Completed  | 19 | University Medical Centre Groningen<br>Groningen, Netherlands             |

|             |                                                                    |                                                              |        |      |                        |     |                                                                                                                                                                                                                                                                                                         |
|-------------|--------------------------------------------------------------------|--------------------------------------------------------------|--------|------|------------------------|-----|---------------------------------------------------------------------------------------------------------------------------------------------------------------------------------------------------------------------------------------------------------------------------------------------------------|
| NCT03406715 | Small Cell Lung Cancer Lung Cancer Relapsed Small Cell Lung Cancer | Nivolumab Ipilimumab Dendritic Cell based <b>p53</b> Vaccine | 2      | 2018 | Active, not recruiting | 14  | H. Lee Moffitt Cancer Center and Research Institute, Tampa, Florida, United States                                                                                                                                                                                                                      |
|             |                                                                    |                                                              |        |      |                        |     | Centre Léon Bérard<br>Lyon, France                                                                                                                                                                                                                                                                      |
| NCT04116541 | Malignant Solid Tumor                                              | HDM201 Ribociclib Cabozantinib Alectinib                     | 2      | 2020 | Recruiting             | 100 | Institut Paoli Calmettes<br>Marseille, France<br>Centre Antoine LACASSAGNE<br>Nice, France<br>Institute Curie<br>Paris, France<br>Institute Claudius Regaud<br>Toulouse, France                                                                                                                         |
|             |                                                                    |                                                              |        |      |                        |     | The Angeles Clinic and Research Institute<br>Los Angeles, California, United States<br>MD Anderson Cancer Center Orlando<br>Orlando, Florida, United States<br>Emory University<br>Atlanta, Georgia, United States,<br>United States, Illinois                                                          |
| NCT01029873 | Metastatic Melanoma                                                | Cisplatin ALT-801                                            | 1<br>2 | 2010 | Completed              | 25  | Northwestern University<br>Chicago, Illinois, United States<br>United States, Iowa<br>University of Iowa Hospitals and Clinics<br>United States, Iowa<br>Iowa City, Iowa, United States, University of Iowa<br>Hospitals and Clinics<br>United States, North Carolina<br>Iowa City, Iowa, United States |

---

Carolinas Medical Center-Brumenthal Cancer Center  
United States, North Carolina

Carolinas Medical Center-Brumenthal Cancer Center,  
Charlotte, North Carolina, United States,

St. Luke's Hospital and Health Network, Pennsylvania,  
United States

St. Luke's Hospital and Health Network, Bethlehem,  
Pennsylvania, United States,

United States, Washington

University of Washington, Seattle Cancer Care Center  
United States, Washington

Seattle, Washington, United States, University of  
Washington, Seattle Cancer Care Center

United States, ColoradoSeattle, Washington, United  
States

University of Colorado, Anschutz Cancer Pavil-  
lionUnited States, Colorado

United States, Washington

United States, WashingtonUniversity of Washington,  
Seattle Cancer Care Center

---

|                                                      |         |   |      |           |    |                                                                                                                                                                                                                                                                                                                                                                                                      |                                                                                                                                                                    |
|------------------------------------------------------|---------|---|------|-----------|----|------------------------------------------------------------------------------------------------------------------------------------------------------------------------------------------------------------------------------------------------------------------------------------------------------------------------------------------------------------------------------------------------------|--------------------------------------------------------------------------------------------------------------------------------------------------------------------|
|                                                      |         |   |      |           |    |                                                                                                                                                                                                                                                                                                                                                                                                      | University of Colorado, Anschutz Cancer, Aurora, Colorado, United States States                                                                                    |
|                                                      |         |   |      |           |    |                                                                                                                                                                                                                                                                                                                                                                                                      | University of Washington, Seattle Cancer Care Center<br>Seattle, Washington, United States,United States, ColoradoUniversity of Colorado, Anschutz Cancer Pavilion |
| Progressive Met-<br>NCT00496860 astatic Malignancies | ALT-801 | 1 | 2007 | Completed | 26 | MD Anderson Cancer Center Orlando, Florida, United States<br>H. Lee Moffitt Cancer Center & Research Institute United States;;University of Colorado, Anschutz Cancer PavillionAurora, Colorado, United States<br>Tampa, Florida, United States, H. Lee Moffitt Cancer Center & Research InstituteAurora, Colorado, United States,United States,Florida<br>Seattle Cancer Care Center United States, |                                                                                                                                                                    |





|             |                                                                                                                                                                                  |                                                |        |      |            |    |                                                                                                                                                                                                                                                                                                                                                                                                         |
|-------------|----------------------------------------------------------------------------------------------------------------------------------------------------------------------------------|------------------------------------------------|--------|------|------------|----|---------------------------------------------------------------------------------------------------------------------------------------------------------------------------------------------------------------------------------------------------------------------------------------------------------------------------------------------------------------------------------------------------------|
| NCT01639885 | Recurrent Ovarian Cancer                                                                                                                                                         | Interferon Alfa-2b<br><b>p53</b> SLP           | 1<br>2 | 2011 | Completed  | 15 | Leiden University Medical Center<br>Leiden, Netherlands                                                                                                                                                                                                                                                                                                                                                 |
| NCT01670994 | Relapsed or Refractory Multiple Myeloma                                                                                                                                          | ALT-801                                        | 1<br>2 | 2012 | Terminated | 6  | University of Iowa Hospitals,<br>Iowa City, Iowa, United States                                                                                                                                                                                                                                                                                                                                         |
| NCT01625260 | Non-muscle Invasive Bladder Cancer                                                                                                                                               | ALT-801<br>Gemcitabine                         | 1<br>2 | 2012 | Unknown    | 52 | University of Alabama Comprehensive Cancer Center<br>Birmingham, Alabama, United States<br>University of California Davis<br>Sacramento, California, United States<br>UF Health Center at Orlando Health<br>Orlando, Florida, United States<br>University of Oklahoma Health Science Center<br>Oklahoma City, Oklahoma, United States<br>UPMC Cancer Center<br>Pittsburgh, Pennsylvania, United States, |
| NCT03725436 | Advanced Malignant Solid Neoplasm<br>Anatomic Stage III Breast Cancer<br>AJCC v8<br>Anatomic Stage IIIA Breast Cancer<br>AJCC v8<br>Anatomic Stage IIIB Breast Cancer<br>AJCC v8 | MDM2/MDMX Inhibitor<br>ALRN-6924<br>Paclitaxel | 1      | 2019 | Recruiting | 45 | M D Anderson Cancer Center<br>Houston, Texas, United States,                                                                                                                                                                                                                                                                                                                                            |

---

Anatomic Stage  
IIIC Breast Cancer AJCC v8  
Estrogen Receptor Positive  
HER2/Neu Negative  
Metastatic Malignant Solid Neoplasm  
Prognostic Stage  
III Breast Cancer AJCC v8  
Prognostic Stage  
IIIA Breast Cancer AJCC v8  
Prognostic Stage  
IIIB Breast Cancer AJCC v8  
Prognostic Stage  
IIIC Breast Cancer AJCC v8  
Recurrent Breast Carcinoma  
**TP53 wt Allele**  
Unresectable Malignant Solid Neoplasm

---

|             |                                                  |                                  |   |      |         |    |                                                                                                                                                                                                                            |
|-------------|--------------------------------------------------|----------------------------------|---|------|---------|----|----------------------------------------------------------------------------------------------------------------------------------------------------------------------------------------------------------------------------|
| NCT01326871 | Transitional Cell<br>Carcinoma of<br>Bladder     | Cisplatin Gemcitabine<br>ALT-801 | 1 | 2011 | Unknown | 90 | The University of Arizona Cancer Center<br>Tucson, Arizona, United States,                                                                                                                                                 |
|             | Urethra Cancer                                   |                                  | 2 |      |         |    | UF Health Center at Orlando Health<br>Orlando, Florida, United States,<br>Martin Health System<br>Stuart, Florida, United States,<br>H. Lee Moffitt Cancer Center and Research Institute<br>Tampa, Florida, United States, |
|             | Ureter Cancer                                    |                                  |   |      |         |    | Emory University<br>Atlanta, Georgia, United States,                                                                                                                                                                       |
|             | <b>Malignant Tu-<br/>mor of Renal<br/>Pelvis</b> |                                  |   |      |         |    | Robert Lurie Comprehensive Cancer Center of North-<br>western University<br>Chicago, Illinois, United States,                                                                                                              |
|             |                                                  |                                  |   |      |         |    | University of Iowa Hospitals and Clinics<br>Iowa City, Iowa, United States,                                                                                                                                                |
|             |                                                  |                                  |   |      |         |    | University of Kansas Cancer Center<br>Fairway, Kansas, United States,                                                                                                                                                      |
|             |                                                  |                                  |   |      |         |    | Karmanos Cancer Center<br>Detroit, Michigan, United States,                                                                                                                                                                |
|             |                                                  |                                  |   |      |         |    | University of Minnesota<br>Minneapolis, Minnesota, United States,                                                                                                                                                          |
|             |                                                  |                                  |   |      |         |    | Washington University<br>St. Louis, Missouri, United States,                                                                                                                                                               |
|             |                                                  |                                  |   |      |         |    | Levine Cancer Institute<br>Charlotte, North Carolina, United States,                                                                                                                                                       |

|             |                                                                                                                                                                      |                                                                        |   |      |            |    |  |                                                                                                |
|-------------|----------------------------------------------------------------------------------------------------------------------------------------------------------------------|------------------------------------------------------------------------|---|------|------------|----|--|------------------------------------------------------------------------------------------------|
|             |                                                                                                                                                                      |                                                                        |   |      |            |    |  | University of Oklahoma Health Science Center<br>Oklahoma City, Oklahoma, United States,        |
|             |                                                                                                                                                                      |                                                                        |   |      |            |    |  | St. Luke's Hospital and Health Network<br>Easton, Pennsylvania, United States,                 |
|             |                                                                                                                                                                      |                                                                        |   |      |            |    |  | Thomas Jefferson University Hospital<br>Philadelphia, Pennsylvania, United States,             |
|             |                                                                                                                                                                      |                                                                        |   |      |            |    |  | UPMC Cancer Center<br>Pittsburgh, Pennsylvania, United States,                                 |
| NCT03113487 | Recurrent Platinum-Resistant Fallopian Tube Carcinoma<br>Recurrent Platinum-Resistant Ovarian Carcinoma<br>Recurrent Platinum-Resistant Primary Peritoneal Carcinoma | Modified Vaccinia Virus Ankara Vaccine Expressing p53<br>Pembrolizumab | 2 | 2018 | Recruiting | 28 |  | United States, California<br>City of Hope Medical Center<br>Duarte, California, United States, |
